# Supplementary material for: Income Volatility and Depressive Symptoms among Elderly Koreans
Source: PubMed Central journal article supplement (PMC6801608; doi:10.3390/ijerph16193580), 2019-09-25
Supplement: ijerph-16-03580-s001.pdf [file ijerph-16-03580-s001.pdf]

## Supplementary Information

Supplementary Table 1. Bivariate correlation.

|                         | 1     | 2     | 3     | 4     | 5     | 6     | 7     | 8     | 9     | 10    | 11    | 12    | 13    | 14   | 15   |
|-------------------------|-------|-------|-------|-------|-------|-------|-------|-------|-------|-------|-------|-------|-------|------|------|
| 1. CES-D                | 1.00  |       |       |       |       |       |       |       |       |       |       |       |       |      |      |
| 2. CES-D<br>(2006)      | 0.33  | 1.00  |       |       |       |       |       |       |       |       |       |       |       |      |      |
| 3. Income<br>level      | -0.25 | -0.28 | 1.00  |       |       |       |       |       |       |       |       |       |       |      |      |
| 4. With<br>children     | 0.01  | -0.02 | -0.07 | 1.00  |       |       |       |       |       |       |       |       |       |      |      |
| 5. Income<br>volatility | 0.04  | 0.04  | -0.14 | 0.06  | 1.00  |       |       |       |       |       |       |       |       |      |      |
| 6. Gender               | 0.11  | 0.16  | -0.23 | 0.05  | 0.03  | 1.00  |       |       |       |       |       |       |       |      |      |
| 7. Age                  | 0.24  | 0.20  | -0.46 | 0.04  | 0.04  | 0.08  | 1.00  |       |       |       |       |       |       |      |      |
| 8. With<br>spouse       | 0.18  | 0.22  | -0.40 | 0.14  | 0.06  | 0.39  | 0.37  | 1.00  |       |       |       |       |       |      |      |
| 9. Job                  | -0.18 | -0.12 | 0.28  | -0.08 | -0.09 | -0.16 | -0.26 | -0.20 | 1.00  |       |       |       |       |      |      |
| 10. Education           | -0.18 | -0.29 | 0.46  | 0.00  | 0.01  | -0.41 | -0.38 | -0.34 | 0.06  | 1.00  |       |       |       |      |      |
| 11. Chronic<br>disease  | 0.18  | 0.17  | -0.15 | -0.02 | 0.00  | 0.08  | 0.18  | 0.10  | -0.16 | -0.13 | 1.00  |       |       |      |      |
| 12. IADL                | 0.25  | 0.14  | -0.18 | 0.09  | 0.02  | -0.05 | 0.31  | 0.10  | -0.16 | -0.11 | 0.13  | 1.00  |       |      |      |
| 13. ADL                 | 0.23  | 0.15  | -0.16 | 0.07  | 0.04  | 0.01  | 0.28  | 0.10  | -0.14 | -0.13 | 0.10  | 0.59  | 1.00  |      |      |
| 14. Residence           | 0.01  | 0.05  | -0.08 | -0.16 | -0.01 | 0.00  | 0.05  | -0.02 | 0.26  | -0.21 | -0.04 | -0.07 | -0.04 | 1.00 |      |
| 15. Wealth              | -0.12 | -0.17 | 0.37  | -0.03 | -0.02 | -0.13 | -0.22 | -0.29 | 0.12  | 0.27  | -0.06 | -0.14 | -0.11 | 0.01 | 1.00 |

**Supplementary Table 2.** The relationships of income volatility to depressive symptoms (sensitivity analysis).

|                                  | (1)                        | (2)                       | (3)                        | (4)                        |
|----------------------------------|----------------------------|---------------------------|----------------------------|----------------------------|
|                                  | CES-D 10                   | CES-D 10                  | CES-D 10                   | CES-D 10                   |
|                                  | Living without Children    | Living with Children      | All                        | All                        |
|                                  | β (95% CI)                 | β (95% CI)                | β (95% CI)                 | β (95% CI)                 |
| Co-residence                     | -                          | -                         | -0.00<br>(-0.06–0.05)      | 0.07 *<br>(0.01–0.14)      |
| Income volatility                | 0.22 *<br>(0.05–0.39)      | -0.42 **<br>(-0.71–-0.14) | 0.01<br>(-0.14–0.16)       | 0.25 **<br>(0.09–0.42)     |
| Co-residence · income volatility | -                          | -                         | -                          | -0.74 ***<br>(-1.08–-0.41) |
| Male                             | 0.02 *<br>(0.00–0.04)      | -0.00<br>(-0.03–0.02)     | 0.01<br>(-0.01–0.02)       | 0.01<br>(-0.01–0.02)       |
| Age                              | 0.01 **<br>(0.00–0.01)     | 0.00<br>(-0.01–0.01)      | 0.00<br>(-0.00–0.01)       | 0.00<br>(-0.00–0.01)       |
| Single (married)                 | 0.09 **<br>(0.03–0.16)     | 0.03<br>(-0.08–0.13)      | 0.06 *<br>(0.00–0.12)      | 0.06 *<br>(0.00–0.12)      |
| Income level                     | -0.08 ***<br>(-0.12–-0.04) | -0.05<br>(-0.11–0.01)     | -0.05 **<br>(-0.09–0.02)   | -0.05 **<br>(-0.09–0.02)   |
| Net asset                        | 0.13 †<br>(-0.02–0.28)     | -0.04<br>(-0.23–0.14)     | -0.13<br>(-0.33–0.07)      | -0.13<br>(-0.33–0.06)      |
| No working                       | 1.00<br>[reference]        | 1.00<br>[reference]       | 1.00<br>[reference]        | 1.00<br>[reference]        |
| Employee                         | -0.21 **<br>(-0.34–-0.08)  | -0.21 *<br>(-0.37–-0.04)  | -0.21 ***<br>(-0.31–-0.10) | -0.21 ***<br>(-0.31–-0.11) |
| Self-employed                    | -0.09 †<br>(-0.18–0.00)    | -0.24 **<br>(-0.39–-0.08) | -0.11 **<br>(-0.19–0.03)   | -0.12 **<br>(-0.20–0.04)   |
| Unpaid family worker             | -0.23 ***<br>(-0.37–-0.10) | -0.23 †<br>(-0.49–0.03)   | -0.23 ***<br>(-0.35–-0.11) | -0.23 ***<br>(-0.35–-0.11) |
| ≤Elementary                      | -0.01<br>(-0.11–0.08)      | 0.03<br>(-0.10–0.17)      | 0.02<br>(-0.07–0.10)       | 0.01<br>(-0.07–0.10)       |
| ≤Middle school                   | 0.03<br>(-0.05–0.12)       | -0.03<br>(-0.15–0.09)     | 0.02<br>(-0.05–0.09)       | 0.02<br>(-0.05–0.09)       |
| ≤High school                     | 0.03<br>(-0.07–0.13)       | -0.08<br>(-0.23–0.06)     | 0.01<br>(-0.08–0.09)       | 0.00<br>(-0.08–0.08)       |
| ≥College                         | 1.00<br>[reference]        | 1.00<br>[reference]       | 1.00<br>[reference]        | 1.00<br>[reference]        |
| Metropolitan                     | 1.00<br>[reference]        | 1.00<br>[reference]       | 1.00<br>[reference]        | 1.00<br>[reference]        |
| City                             | 0.03<br>(-0.04–0.10)       | 0.17 ***<br>(0.08–0.26)   | 0.08 **<br>(0.03–0.14)     | 0.08 **<br>(0.02–0.13)     |
| Rural                            | 0.03<br>(-0.03–0.10)       | 0.01<br>(-0.10–0.12)      | 0.03<br>(-0.02–0.09)       | 0.04<br>(-0.02–0.09)       |
| No chronic disease               | 1.00<br>[reference]        | 1.00<br>[reference]       | 1.00<br>[reference]        | 1.00<br>[reference]        |
| Chronic disease: 1               | 0.02                       | 0.10 †                    | 0.05                       | 0.05                       |

| (0)                 |                          |                          |                          |                          |
|---------------------|--------------------------|--------------------------|--------------------------|--------------------------|
| Chronic disease: 2+ | (-0.06-0.10)<br>0.13 *** | (-0.01-0.20)<br>0.16 **  | (-0.02-0.11)<br>0.14 *** | (-0.02-0.11)<br>0.14 *** |
| IADL: 1+ (0)        | (0.06-0.20)<br>0.33 ***  | (0.05-0.26)<br>0.05      | (0.08-0.20)<br>0.24 ***  | (0.08-0.21)<br>0.24 ***  |
| ADL: 1+ (0)         | (0.24-0.41)<br>0.09 †    | (-0.08-0.17)<br>0.29 *** | (0.17-0.31)<br>0.14 **   | (0.17-0.31)<br>0.13 **   |
| 2006 CES-D 10       | (-0.01-0.19)<br>0.07 *** | (0.15-0.42)<br>0.06 ***  | (0.05-0.22)<br>0.06 ***  | (0.05-0.22)<br>0.07 ***  |
| Household income    | (0.06-0.08)<br>-         | (0.05-0.08)<br>-         | (0.06-0.07)<br>-0.03 †   | (0.06-0.07)<br>-0.03 †   |
| Household wealth    | -                        | -                        | (-0.06-0.00)<br>0.80 *   | (-0.06-0.00)<br>0.80 *   |
| Observations        | 2753                     | 1370                     | (0.15-1.46)<br>3775      | (0.15-1.44)<br>3775      |

Abbreviations: CES-D 10, Center for Epidemiologic Studies-Depression 10-item Scale; IADL, instrumental activities of daily living; ADL, activities of daily living; CI, confidence interval. \*\*\*  $p < 0.001$ , \*\*  $p < 0.01$ , \*  $p < 0.05$ , †  $p < 0.1$ ; Negative Binomial regressions on CES-D 10 score from the 2012 KLoSA (robust standard errors); all adjusted variable, except 2006 CES-D 10 and income level and volatility, are collected from the 2012 KLoSA.
